1 **Direct and transgenerational effects of an experimental heat wave on early life**  
2 **stages in a freshwater snail**

3

4 **Katja Leicht<sup>1,2</sup>, Otto Seppälä<sup>1,3</sup>**

5 <sup>1</sup> Eawag, Swiss Federal Institute of Aquatic Science and Technology, 8600 Dübendorf,

6 Switzerland

7 <sup>2</sup> Department of Biological and Environmental Science, PO Box 35, 40014 University of

8 Jyväskylä, Finland

9 <sup>3</sup> ETH Zürich, Institute of Integrative Biology (IBZ), 8092 Zürich, Switzerland

10

11 Corresponding author:

12 Otto Seppälä

13 Eawag, Swiss Federal Institute of Aquatic Science and Technology, 8600 Dübendorf,

14 Switzerland

15 Tel: +41 58 765 5348

16 Fax: +41 58 765 5802

17 E-mail: otto.seppaelae@eawag.ch

18

19 Running title: Direct and transgenerational effects of a heat wave

20

21

22

23

24

25 **Abstract**

26 Global climate change imposes a serious threat to natural populations of many species. Estimates  
27 of the effects of climate change are, however, typically based only on its direct effects on  
28 organisms, completely neglecting the potential transgenerational effects. We investigated whether  
29 high temperature (an experimental heat wave) that reduces adult performance, affects offspring  
30 through maternal effects, which traits are affected, and how strong these effects are compared  
31 with direct effects of high temperature in the freshwater snail *Lymnaea stagnalis*. We examined  
32 the effect of maternal thermal environment (15°C versus 25°C) on per offspring investment (egg  
33 size), and the role of both maternal and offspring thermal environments on offspring performance  
34 (hatching success and developmental time of eggs, survival and size of hatched offspring after  
35 five weeks). Exposure of mothers to high temperature benefitted offspring at very early stages of  
36 their life cycles (hatching success, onset of hatching), but had negative effects at later stages  
37 (survival, size). Direct effects of high temperature on offspring were largely negative.  
38 Interestingly, the magnitude of transgenerational effects of high temperature on hatching success  
39 and survival were similar to its direct effects. This indicates that heat waves cannot only impact  
40 natural populations across generations, but that such effects can be equally strong to the direct  
41 effects of temperature. Our results highlight the importance of considering transgenerational  
42 effects of climate change when estimating its effects in the wild.

43

44 **Keywords:** climate change, environmental stress, global warming, *Lymnaea stagnalis*, maternal  
45 effects

46

47

48

49 **Introduction**

50 Owing to global climate change, the average temperatures at the Earth's surface as well as the  
51 frequency and severity of extreme weather events such as summer heat waves are increasing  
52 (Easterling *et al.* 2000; Karl & Trenberth 2003; Meehl & Tebaldi 2004; Kirtman *et al.* 2013).  
53 These changes can have strong effects on organisms that escalate to higher levels of biological  
54 organization such as populations and communities (Walther *et al.* 2002; Parmesan & Yohe 2003;  
55 Walther 2010). Especially extreme weather events can dramatically influence population  
56 dynamics, species abundance, and species interactions (e.g. Easterling *et al.* 2000; Bruno *et al.*  
57 2007; Hance *et al.* 2007). However, environmental conditions cannot only influence the fitness of  
58 the individuals exposed to them but also the fitness of their offspring through transgenerational  
59 maternal and/or paternal effects (reviewed in Bernardo 1996; Mousseau & Fox 1998a). Hence,  
60 for understanding the effects of climate change on natural populations, studies examining  
61 temperature effects not only within but also across generations are needed.

62       Especially transgenerational maternal effects after exposure to environmental stress can  
63 significantly alter offspring performance (e.g. Silbermann & Tatar 2000; Mitchell & Read 2005;  
64 Janhunen, Piironen & Peuhkuri 2010). Such effects can result from reduced physiological  
65 condition of the mother that limits the total amount of resources it invests in reproduction  
66 (Tessier *et al.* 1983; Steer *et al.* 2004), and/or exposure of offspring to hormones produced by the  
67 mother (McCormick 1999; Groothuis & Schwabl 2008). Maternal effects could also take place  
68 via altered resource allocation between reproduction and other traits depending on the  
69 environmental conditions the mother experiences. Challenging environmental conditions may, for  
70 example, reduce resource allocation to produced offspring to sustain self-maintenance, or  
71 increase per offspring investment when the reproductive value of individuals is changed so that  
72 investment in current reproduction increases at the expense of future reproduction (Fisher 1930;

73 Williams 1966). Furthermore, maternal effects can be adaptations to prepare offspring for the  
74 future conditions they are about to encounter (e.g. herbivory, parasitism, pollution; Agrawal  
75 2002; Moret 2006; Marshall 2008).

76 To understand the consequences of such transgenerational effects in context of climate  
77 change, it is essential to estimate their direction and magnitude compared with the direct effects  
78 of the same environmental factors. Maternal effects are typically strongest in early stages of  
79 organisms' life histories (Mousseau & Dingle 1991; Heath, Fox & Heath 1999; Pettay *et al.*  
80 2008), but such stages are often also highly susceptible to the direct effects of environmental  
81 variation (e.g. Jang 1991; Zhang *et al.* 2015; Klockmann, Günter & Fischer 2017). For example,  
82 temperature determines the development of eggs and juveniles by altering their metabolic and  
83 physiological processes in many species (Gillooly *et al.* 2001; Person-Le Ruyet *et al.* 2004; Zuo  
84 *et al.* 2012). High temperature in particular can impose a serious challenge by reducing the  
85 hatching success of eggs and early survival of hatched offspring (Janhunen *et al.* 2010; Zhang *et al.*  
86 2015; Klockmann *et al.* 2017). Despite of high interest on transgenerational effects of climate  
87 change in natural populations (reviewed in Donelson *et al.* 2018), their relative importance  
88 compared with direct effects of the same environmental factors is, however, often overlooked  
89 (but see Burgess & Marshall 2011; Parker *et al.* 2012; Salinas & Munch 2012; Shama *et al.* 2014;  
90 Wadgymar, Mactavish & Anderson 2018).

91 Here, we tested whether high temperature as it can occur during heat waves has  
92 transgenerational effects on offspring performance, which traits they affect, and how strong they  
93 are compared with direct effects of high temperature in the freshwater snail *Lymnaea stagnalis*.  
94 We estimated the effect of maternal thermal environment (15°C versus 25°C) on per offspring  
95 investment by adult snails (egg size), and the role of both maternal and offspring thermal  
96 environments on offspring performance (hatching success and developmental time of eggs,

97 survival of hatched offspring, offspring size at the age of five weeks) using a full-factorial design.  
98 We used 25°C as a high (i.e. heat wave) temperature as it lies above the thermal optimum of the  
99 snails (Vaughn 1953), reduces life history and immune defence traits in adult snails (Seppälä &  
100 Jokela 2011; Leicht, Jokela & Seppälä 2013), and occurs intermittently in habitats of snails  
101 during hot summers (T. Salo 2015, unpublished data). We chose 15°C as a control temperature as  
102 it is close to the thermal optimum of *L. stagnalis* (Vaughn 1953) and common in ponds (T. Salo  
103 2015, unpublished data). We found that high temperature affected offspring performance both  
104 directly and through maternal effects. The relative importance and the direction of these effects  
105 varied among traits, and maternal effects were equally strong to direct effects in some of the  
106 examined traits. This highlights the importance of considering transgenerational effects when  
107 estimating the consequences of climate change in natural populations.

108

## 109 **Methods**

### 110 *Study system and experimental animals*

111 *Lymnaea stagnalis* is a hermaphroditic freshwater snail that inhabits ponds and lakes in the  
112 Holarctic region. In this species, exposure to high temperature initially increases growth and  
113 reproduction, but prolonged exposure (one week or longer) ceases reproductive rate and reduces  
114 immune function (Seppälä & Jokela 2011; Leicht *et al.* 2013). This indicates that high  
115 temperature is physiologically challenging and has strong negative effects on adult snails.

116 The snails used in this study came from a laboratory stock population (F<sub>4</sub> generation)  
117 originating from a pond in Zürich, Switzerland (47°22'N, 8°34'E). The summer water  
118 temperature in ponds typically remains low (< 16°C) in this region, although it depends on pond  
119 hydrology (T. Salo, 2015, unpublished data). However, during heat waves, water temperature can

120 rapidly increase to 20–30°C and remain high for over two weeks (T. Salo, 2015, unpublished  
121 data). We started the stock population using 45 adult snails collected from the pond. Since *L.*  
122 *stagnalis* prefers outcrossing (Puurtilinen *et al.* 2007; Nakadera *et al.* 2017), often engages in  
123 multiple matings (Nakadera *et al.* 2017), and can store sperm from those matings for over two  
124 months (Nakadera, Blom & Koene 2014), the stock population can be expected to reflect the  
125 genetic variation in the source population well. We maintained the stock population in large  
126 numbers at  $15 \pm 2^\circ\text{C}$  (control temperature used in the experiment; see the section about  
127 experimental design below) for two years before the study (Leicht, Seppälä & Seppälä 2017). We  
128 haphazardly collected 113 adult snails from the stock population and used them as a maternal  
129 generation in the experiment. We placed the snails individually in 2 dl perforated plastic cups  
130 sunk into a water bath (aged tap water at  $15 \pm 1^\circ\text{C}$ ) connected to a biological filter. We fed the  
131 snails with fresh lettuce *ad libitum* and maintained them under these conditions for three days  
132 prior to the experiment to acclimate them to the experimental conditions. Since *L. stagnalis* can  
133 store allosperm from previous matings (Cain 1956; Nakadera *et al.* 2014), snails did not need a  
134 mating partner to reproduce under these conditions.

135

### 136 *Experimental design*

#### 137 Maternal treatments

138 At the beginning of the experiment, we randomly assigned the snails used as a maternal  
139 generation (see the previous section) into two temperature treatments [ $15 \pm 1^\circ\text{C}$  (56 snails),  $25 \pm$   
140  $1^\circ\text{C}$  (60 snails)]. We transferred the snails to their treatment temperatures in cups filled with aged  
141 tap water at  $15^\circ\text{C}$ . This allowed a slow change (over 10 h) to the target temperature for snails  
142 assigned to the high temperature treatment. We then transferred the snails into perforated plastic  
143 cups (2 dl) sunk into similar water baths as above, and exposed them to their respective

144 temperature treatments for seven days. During this period, survival of snails exposed to 25°C was  
145 reduced (estimated marginal mean  $\pm$  SE: 66.1  $\pm$  6.2%) compared with snails exposed to 15°C  
146 (estimated marginal mean  $\pm$  SE: 94.4  $\pm$  3.1%; generalized linear model: Wald Chi-Square =  
147 10.940, d.f. = 1,  $p$  = 0.001). In those snails that survived, the probability of reproducing was  
148 higher at 25°C (estimated marginal mean  $\pm$  SE: 87.2  $\pm$  5.4%) than at 15°C (estimated marginal  
149 mean  $\pm$  SE: 49.0  $\pm$  7.0%; generalized linear model: Wald Chi-Square = 12.429, d.f. = 1,  $p$  <  
150 0.001). We did not measure the number of oviposited eggs in this study as the effect of  
151 temperature on reproduction has been described in detail earlier (Leicht *et al.* 2013; Leicht *et al.*  
152 2017). It is important to note that because all parental snails did not survive or reproduce,  
153 potential differences between the treatments in offspring generation could arise from selection in  
154 parental population. This could be, for instance, if weak snails could not survive/reproduce under  
155 environmental stress. This is, however, unlikely to explain our results since the effects of high  
156 maternal temperature on offspring were mainly negative (see the results section below). If only  
157 high quality individuals were able to produce offspring under high temperature this should  
158 instead make our results more conservative.

159         After the initial exposure to temperature treatments, we removed all egg clutches  
160 oviposited by the snails from the cups. Throughout the following ten days, we checked the cups  
161 twice a day for new clutches to be collected for the next step of the experiment (see the next  
162 section). This procedure ensured first, that the snails were exposed to their respective temperature  
163 treatments long enough to induce strong effects on their performance before the clutches were  
164 collected (see Leicht *et al.* 2013), and second, that the collected clutches were exposed to the  
165 maternal temperature treatments only briefly. From each snail that oviposited (same individuals  
166 as above reproduced), we collected the first clutch containing more than 20 eggs, or if only  
167 smaller clutches were produced, the largest clutch. We placed each collected clutch on a

168 millimetre paper and photographed it from 10 cm above with a Fujifilm FinePix F30 digital  
169 camera (scene mode: close up, focal length: 35 mm, aperture: F/2.8, shutter speed: 1/85,  
170 sensitivity: ISO-200, image size: 2848 × 2136 pixels, focus mode: auto focus). From the digital  
171 images, we counted the eggs in each clutch. Furthermore, we measured the two-dimensional area  
172 (mm<sup>2</sup>) of five randomly chosen eggs in each clutch from the digital images using ImageJ  
173 software (ImageJ 1.42q, Wayne Rasband, National Institute of Health, USA). After  
174 photographing, we placed the clutches individually into plastic cups with 0.4 dl of aged tap water  
175 to be transferred to the next step of the experiment (see the next section). It is important to note  
176 that the time different snails needed for ovipositing after the initial exposure period varied  
177 between one and ten days, which may have affected the thermal challenge imposed to them as  
178 well as their offspring. However, to our knowledge, oviposition cannot be artificially induced in  
179 this species.

180

### 181 Offspring treatments

182 We randomly assigned the clutches produced by the snails (see the previous section) into two  
183 offspring temperature treatments (15°C, 25°C) so that in each maternal treatment the clutches  
184 oviposited by half of the snails remained at the same temperature where they were produced and  
185 the clutches from the rest of the snails were transferred to the other temperature. We slowly  
186 warmed up or cooled down the clutches that were transferred to a different temperature as  
187 described above to avoid a sudden change between temperatures. After that, we checked the  
188 clutches daily, counted the number of hatched snails, and removed the hatchlings from the cups.  
189 We placed 15 hatchlings from each clutch individually in plastic cups filled with 0.4 dl of aged  
190 tap water. We fed the snails with *Spirulina* ad libitum, and changed the water in the cups twice a



191 week. We reared the isolated hatchlings for five weeks, and measured their survival and shell  
192 length to the nearest 0.1 mm using a digital calliper at the end of the experiment.

193

#### 194 **Statistical analyses**

195 We analysed the effect of temperature on the size of produced eggs (ln transformed) using an  
196 analysis of variance (ANOVA). In the analysis, we used a model with maternal temperature  
197 treatment as a fixed and the clutch each egg originated from (i.e. family) as a random factor  
198 (nested within maternal temperature).

199 To estimate the effects of maternal and offspring temperature on offspring performance,  
200 we first analysed the variation in hatching success of eggs using a generalized linear model. In  
201 the analysis, we used the proportion of eggs that hatched from each clutch as a binomial response  
202 variable (logit link function), and maternal temperature treatment and offspring temperature  
203 treatment as fixed factors. Less than three snails hatched from two clutches. We excluded these  
204 individuals from all the further analyses as they would not provide suitable replication within  
205 those families.

206 After that, we calculated the developmental time until hatching for each egg as the  
207 difference between the date the clutch was oviposited and the hatching date. We then analysed  
208 the effects of temperature on developmental time using a multivariate analysis of variance  
209 (MANOVA, with Pillai's trace test statistic for unequal sample sizes). We used the onset of  
210 hatching (i.e. the first hatching day; square-root transformed), median developmental time (we  
211 used the median rather than the mean as the distribution of hatching time within the clutches was  
212 skewed), and the end of hatching (i.e. the last hatching day; ln transformed) for each clutch as  
213 response variables. We used maternal temperature treatment and offspring temperature treatment  
214 as fixed factors in the model. Since the MANOVA indicated effects of temperature on

215 developmental time (see the results section), we conducted separate ANOVAs using a similar  
216 model as above for the different parameters of developmental time to investigate whether their  
217 responses to temperature were different.

218 We analysed the variation in survival of hatched offspring during the experiment using a  
219 generalized linear model with the status of snails (survived, died) as a binomial response variable  
220 (logit link function), maternal temperature treatment and offspring temperature treatment as fixed  
221 factors, and family as a random factor (nested within the interaction between maternal  
222 temperature and offspring temperature). From the offspring that survived until the end of the  
223 experiment, we analysed the variation in size using an ANOVA with shell length (square-root  
224 transformed) as a response variable, maternal temperature treatment and offspring temperature  
225 treatment as fixed factors, and family as a random factor (nested within the interaction of  
226 maternal temperature and offspring temperature). Survival and/or size could not be measured  
227 from 30 juvenile snails (3.5% of all individuals) because of human errors. We excluded these  
228 snails from the data. The assumptions of all the above analyses were fulfilled, and we performed  
229 them using IBM SPSS Statistics Version 23.0 software (Armonk, NY: IBM Corp.).

230

## 231 **Results**

232 Eggs oviposited by snails at 25°C were smaller than those oviposited at 15°C (two-dimensional  
233 area; estimated marginal mean  $\pm$  SE: 25°C:  $1.11 \pm 0.01$  mm<sup>2</sup>; 15°C:  $1.30 \pm 0.01$  mm<sup>2</sup>; ANOVA:  
234  $F_{1,57} = 26.275$ ,  $p < 0.001$ ). Hatching success of eggs was affected by both the maternal  
235 temperature treatment and the offspring temperature treatment (Table 1, Fig. 1). High maternal  
236 temperature and low offspring temperature increased hatching success (Fig. 1). Maternal and  
237 offspring temperature also affected the developmental time of eggs (MANOVA, maternal  
238 temperature treatment: Pillai's trace = 0.310,  $F_{3,51} = 7.654$ ,  $p < 0.001$ ; offspring temperature

239 treatment: Pillai's trace = 0.918,  $F_{3,51} = 191.413$ ,  $p < 0.001$ ; maternal temperature treatment  $\times$   
240 offspring temperature treatment: Pillai's trace = 0.046,  $F_{3,51} = 0.827$ ,  $p = 0.485$ ). Offspring started  
241 to hatch earlier when mothers had been exposed to 25°C (ANOVA:  $F_{1,53} = 15.806$ ,  $p < 0.001$ ;  
242 Fig. 2). Furthermore, the onset, median, and end of hatching were earlier when offspring were  
243 maintained at 25°C (ANOVA: first day of hatching:  $F_{1,53} = 571.961$ ,  $p < 0.001$ ; median  
244 developmental time:  $F_{1,53} = 189.817$ ,  $p < 0.001$ ; last day of hatching:  $F_{1,53} = 62.002$ ,  $p < 0.001$ ;  
245 Fig. 2).

246  
247 **Table 1.** Generalized linear model for hatching success of *L. stagnalis* eggs (proportion of eggs  
248 that hatched per clutch) by maternal temperature treatment (15°C, 25°C) and offspring  
249 temperature treatment (15°C, 25°C).

| Effect                              | d.f. | Wald-Chi-Square | p       |
|-------------------------------------|------|-----------------|---------|
| Maternal temperature treatment (M)  | 1    | 29.992          | < 0.001 |
| Offspring temperature treatment (O) | 1    | 24.833          | < 0.001 |
| M $\times$ O                        | 1    | 0.377           | 0.539   |

254

255

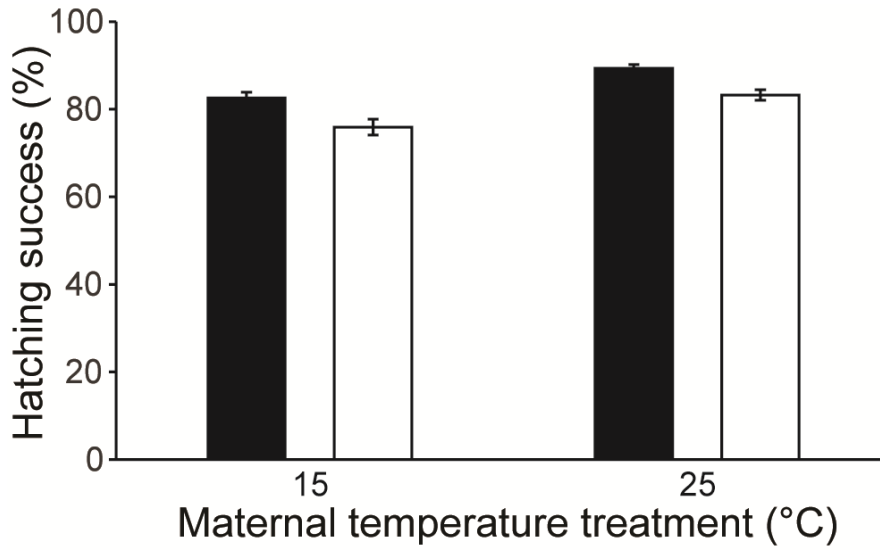

256

257 **Figure 1.** Hatching success of eggs [proportion of eggs that hatched (%; mean  $\pm$  SE)] for egg  
258 clutches produced at different maternal temperature treatments (15°C, 25°C) and maintained at  
259 15°C (black bars) or at 25°C (white bars).

260

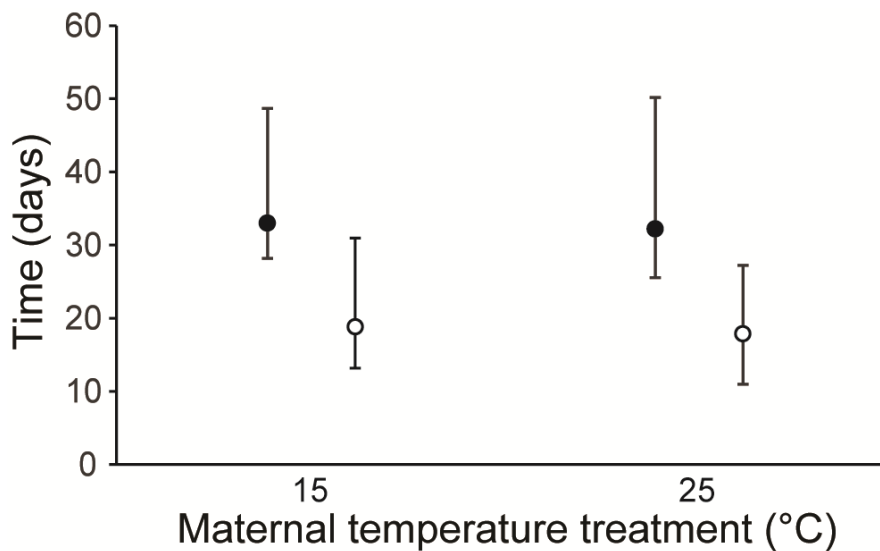

261

262 **Figure 2.** Developmental time of eggs presented using the means for onset of hatching (lower  
263 whisker), median developmental time (circles), and the end of hatching (upper whisker) for egg  
264 clutches produced at different maternal temperature treatments (15°C, 25°C) and maintained at  
265 15°C (black circles) or at 25°C (white circles).

266

267 High maternal temperature reduced offspring survival (Table 2, Fig. 3). When offspring  
268 were maintained at 25°C, they showed tendency towards lower survival (Table 2, Fig. 3).

269 Temperature affected the size of offspring so that high maternal temperature and low offspring  
270 temperature reduced shell length at the end of the experiment (Table 3, Fig. 4).

271

272 **Table 2.** Generalized linear model for survival of juvenile *L. stagnalis* snails during the  
273 experiment (survived/died) by maternal temperature treatment (15°C, 25°C), offspring  
274 temperature treatment (15°C, 25°C), and family.

| Effect                              | d.f. | F     | Estimate | SD    | Z     | p     |
|-------------------------------------|------|-------|----------|-------|-------|-------|
| Maternal temperature treatment (M)  | 1    | 4.452 |          |       |       | 0.035 |
| Offspring temperature treatment (O) | 1    | 3.588 |          |       |       | 0.059 |
| M × O                               | 1    | 1.587 |          |       |       | 0.208 |
| family (M × O)                      |      |       | 0.582    | 0.184 | 3.165 | 0.002 |

280

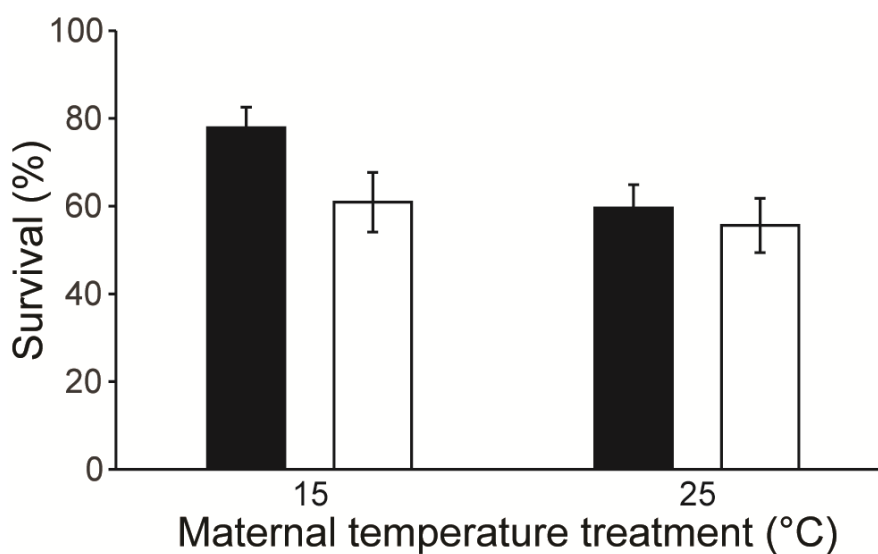

281

282 **Figure 3.** Proportion (%; estimated marginal mean  $\pm$  SE) of offspring that survived until the end  
 283 of the experiment when produced at different maternal temperature treatments (15°C, 25°C) and  
 284 maintained at 15°C (black bars) or at 25°C (white bars).

285

286 **Table 3.** Analysis of variance for shell length of juvenile *L. stagnalis* snails at the end of the  
 287 experiment by maternal temperature treatment (15°C, 25°C), offspring temperature treatment  
 288 (15°C, 25°C), and family.

| Effect                              | d.f. | MS     | F                    | p       |
|-------------------------------------|------|--------|----------------------|---------|
| Maternal temperature treatment (M)  | 1    | 3.926  | 15.012 <sup>a</sup>  | < 0.001 |
| Offspring temperature treatment (O) | 1    | 54.520 | 208.927 <sup>a</sup> | < 0.001 |
| M $\times$ O                        | 1    | 0.216  | 0.827 <sup>a</sup>   | 0.367   |
| family (M $\times$ O)               | 53   | 0.302  | 3.370                | < 0.001 |
| error                               | 455  | 0.090  |                      |         |

295 <sup>a</sup> family(M  $\times$  O) as the error term

296

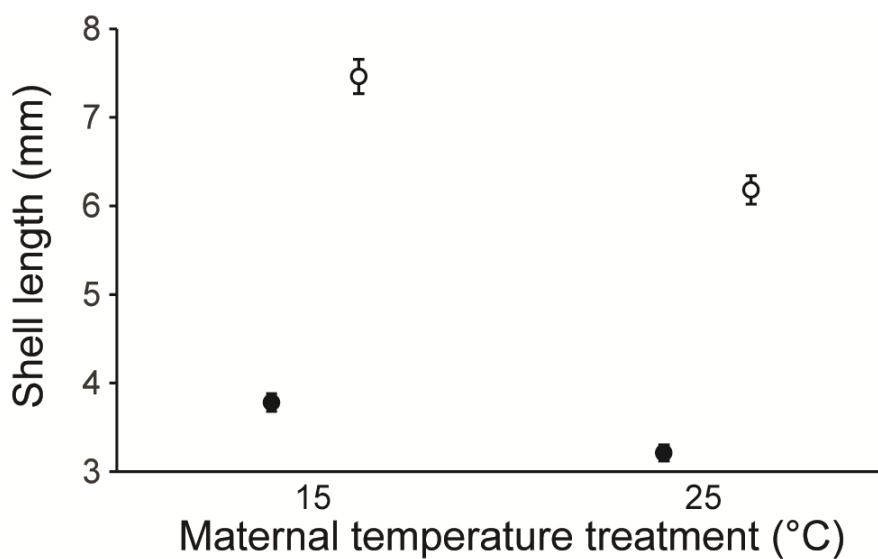

297

298 **Figure 4.** Offspring shell length (mm; estimated marginal mean  $\pm$  SE) at the end of the  
299 experiment when produced at different maternal temperature treatments (15°C, 25°C) and  
300 maintained at 15°C (black circles) or at 25°C (white circles).

301

## 302 **Discussion**

303 Exposure to an experimental heat wave affected eggs and hatchlings of *L. stagnalis* snails both  
304 directly and via transgenerational maternal effects. Direct effects of high temperature were  
305 largely negative. The magnitude and the direction of transgenerational effects when compared  
306 with direct effects varied among examined traits. In general, high maternal temperature benefitted  
307 offspring at very early life stages, but reduced performance at later stages. Hence, the potential  
308 adaptive value of responding to high temperature by maternal effects may be limited only to very  
309 early life stages (Mousseau & Dingle 1991; Heath *et al.* 1999; Pettay *et al.* 2008). Interestingly,  
310 the magnitude of transgenerational effects on hatching success and survival of offspring were  
311 similar to the direct effects of high temperature. These findings indicate that heat waves cannot  
312 only impact natural populations across generations, but those effects can be equally strong to  
313 their direct within generation effects.

314

### 315 *Effects of temperature on eggs*

316 Mothers exposed to high temperature produced smaller eggs that had higher hatching success  
317 compared with snails that oviposited at benign temperature (14.6% reduction in size, 9.0%  
318 increase in hatching success). Thus, exposure of the maternal generation to high temperature can  
319 increase the quality of produced eggs despite their smaller size. High maternal temperature made  
320 the onset of hatching earlier by 2.5 days (12.3% reduction). The magnitude of the direct effect of  
321 high temperature on hatching success of eggs was similar to the observed transgenerational effect

322 but negative (7.5% reduction). The direct effect of high temperature on development of eggs was  
323 strong by shortening the median developmental time by two weeks (43.8% reductions). Faster  
324 development and earlier hatching is suggested to be accompanied by higher fitness by increasing  
325 future survival (Arcese & Smith 1985; Warner & Shine 2007) and allowing earlier maturation  
326 and increased reproductive output (Uller & Olsson 2010). However, early hatching may also  
327 bring disadvantages by leading to less well developed offspring (e.g. Warkentin 1999; Buckley,  
328 Michael & Irschick 2005).

329         Reduced egg size at high temperature may be adaptive to decreased oxygen concentration  
330 in water and increased oxygen consumption of developing eggs at high temperature (Woods  
331 1999; Moran & Woods 2007). Therefore, egg size might not be a good indicator for egg quality.  
332 The observed transgenerational effect of high temperature on development of eggs  
333 (developmental time and hatching success) may be due to two non-exclusive mechanisms. First,  
334 high temperature can increase metabolic rate and resource level of adults that allow production of  
335 high quality eggs (see Jann & Ward 1999; Saino *et al.* 2004). Second, it may increase resource  
336 allocation towards reproduction rather than other traits when the residual reproductive value of  
337 individuals decrease, for example, due to increased mortality (Fisher 1930; Williams 1966). The  
338 effect of maternal temperature on developmental time of eggs was, however, limited to the onset  
339 of hatching. This indicates that the possibly increased investment on oviposited eggs may be  
340 rapidly depleted. On the other hand, smaller eggs are expected to develop more slowly (Levitan  
341 2000). Therefore, it is possible that high maternal investment and small egg size overrode each  
342 other's effects so that no net change in developmental time of eggs could be detected. The direct  
343 effect of temperature on hatching success of eggs is likely to be due to high sensitivity of mollusc  
344 embryos to high temperature (Vaughn 1953), which leads to mortality in several taxa probably  
345 due to denaturation of proteins (reviewed in Pepin 1991; Noble, Stenhouse & Schwanz 2018).



346 The direct effect of temperature on developmental time of eggs was most likely because  
347 temperature determines the speed of biochemical processes of the developing embryos (e.g.  
348 García-Guerrero, Villarreal & Racotta 2003; Sibert, Ouellet & Brêthes 2004).

349

350 *Effects of temperature on hatchlings*

351 Exposure of mothers to high temperature reduced the probability of offspring to survive until the  
352 age of five weeks (17.8% reduction compared with 15°C). High maternal temperature also  
353 reduced the size offspring reached (28.9% reduction). High temperature showed tendency to have  
354 a negative direct effect on offspring survival (16.1% reduction). However, offspring that survived  
355 grew larger at high temperature (97.4% increase in size). Hence, high maternal temperature  
356 reduced offspring performance in the examined traits while the direct effects of high temperature  
357 were both positive and negative. Reduced size of offspring due to high maternal temperature may  
358 lead to delayed maturity as well as reduced mating success and fecundity (reviewed in Clutton-  
359 Brock 1988), and also increase susceptibility to predators (e.g. Janzen 1993; Craig *et al.* 2006).  
360 Instead, direct effect of high temperature can benefit those individuals that are able to survive  
361 under such conditions.

362 Reduced offspring size when mothers experience high temperature is found across a wide  
363 range of animal taxa (reviewed in Atkinson *et al.* 2001). The reason for this is not yet clear and  
364 may either be an adaptation to maximize mother's life time fitness (Yampolsky & Scheiner 1996)  
365 or due to physiological constraints under such conditions (Blanckenhorn 2000). The direct effect  
366 of high temperature on offspring survival may be due to temperature-induced changes in, for  
367 instance, protein structures and/or membrane fluidity (reviewed in Pörtner, Lucassen & Storch  
368 2005), which can lead to body malfunctions and increased mortality. On the other hand, high

369 temperature fastens metabolic rate and can increase growth of organisms (e.g. Iguchi & Ikeda  
370 2005; Salo *et al.* 2017).

371

### 372 *General conclusions*

373 Our findings of equally strong direct and transgenerational effects of exposure to high  
374 temperature contradict earlier studies that have examined their relative importance in determining  
375 offspring performance and physiology (e.g. Groeters & Dingle 1988; Huey *et al.* 1995; Steigenga  
376 & Fischer 2007; Burgess & Marshall 2011; Salinas & Munch 2012; Shama *et al.* 2014). In those  
377 studies, transgenerational effects of temperature are typically reported to be weak compared with  
378 its direct effects. To our knowledge, transgenerational effects of environmental change have been  
379 found to be strong compared with its direct effects in a climate change context only in  
380 germination probability of a perennial forb, *Boechera stricta*, when wintering conditions are  
381 manipulated (Wadgymar *et al.* 2018). Together with that finding, our results indicate that climate  
382 change mediated environmental changes cannot only impact natural populations across  
383 generations, but those effects can be equally strong or even stronger than their direct effects  
384 within generations.

385         Despite of high interest on transgenerational effects of climate change-mediated  
386 environmental change on organisms (Donelson *et al.* 2018) many studies have not tested their  
387 relative importance compared with direct within generation effects. This is because earlier studies  
388 have focused, for example, on testing whether negative effects of environmental change are  
389 reduced if parents experience the same environmental conditions (e.g. Donelson *et al.* 2012;  
390 Miller *et al.* 2012). Testing this does not necessarily require a full-factorial design that is needed  
391 for examining the relative importance of direct and transgenerational effects. This alternative  
392 approach is relevant in systems where environment changes gradually and relatively slowly to a

393 predicted direction (e.g. in oceans). Such studies would, however, not be realistic in terrestrial  
394 and freshwater systems that experience high and rapid fluctuations in several environmental  
395 conditions owing to climate change. In marine species, exposing parents to altered environmental  
396 conditions has been found to reduce the negative effects of increased temperature and CO<sub>2</sub>-level  
397 on offspring (Donelson *et al.* 2012; Miller *et al.* 2012; Shama *et al.* 2014). In our study, none of  
398 the observed direct effects of temperature depended on the maternal environment. This may be  
399 due to higher unpredictability of extreme weather events in freshwater systems compared with  
400 marine environments that could limit the ability of such adaptive maternal effects to evolve (see  
401 Mousseau & Fox 1998b).

402

#### 403 **Acknowledgements**

404 We thank K. Räsänen and J. Jokela for constructive comments on the manuscript. The study was  
405 funded by the Biological Interactions Doctoral Program (BIOINT) to KL, and the Emil Aaltonen  
406 Foundation and Swiss National Science Foundation (grant 31003A 140876 and 31003A 169531)  
407 to OS.

408

#### 409 **Conflict of interest disclosure**

410 The authors of this preprint declare that they have no financial conflict of interest with the  
411 content of this article.

412

#### 413 **References**

414 Agrawal, A.A. (2002) Herbivory and maternal effects: mechanisms and consequences of  
415 transgenerational induced plant resistance. *Ecology*, **83**, 3408-3415.

- 416 Arcese, P. & Smith, J.N.M. (1985) Phenotypic correlates and ecological consequences of  
417 dominance in song sparrows. *Journal of Animal Ecology*, **54**, 817-830.
- 418 Atkinson, D., Morley, S.A., Weetman, D. & Hughes, R.N. (2001) Offspring size responses to  
419 maternal temperature in ectotherms. *Environment and animal development: genes, life*  
420 *histories and plasticity* (eds D. Atkinson & M. Thorndyke), pp. 269-285. BIOS Scientific,  
421 Oxford.
- 422 Bernardo, J. (1996) Maternal effects in animal ecology. *American Zoologist*, **36**, 83-105.
- 423 Blanckenhorn, W.U. (2000) Temperature effects on egg size and their fitness consequences in the  
424 yellow dung fly *Scathophaga stercoraria*. *Evolutionary Ecology*, **14**, 627-643.
- 425 Bruno, J.F., Selig, E.R., Casey, K.S., Page, C.A., Willis, B.L., Harvell, C.D., Sweatman, H. &  
426 Melendy, A.M. (2007) Thermal stress and coral cover as drivers of coral disease  
427 outbreaks. *Plos Biology*, **5**, 1220-1227.
- 428 Buckley, C.R., Michael, S.F. & Irschick, D.J. (2005) Early hatching decreases jumping  
429 performance in a direct-developing frog, *Eleutherodactylus coqui*. *Functional Ecology*,  
430 **19**, 67-72.
- 431 Burgess, S.C. & Marshall, D.J. (2011) Temperature-induced maternal effects and environmental  
432 predictability. *Journal of Experimental Biology*, **214**, 2329-2336.
- 433 Cain, G.L. (1956) Studies on cross-fertilization and self-fertilization in *Lymnaea stagnalis*  
434 *appressa* Say. *Biological Bulletin*, **111**, 45-52.
- 435 Clutton-Brock, T.H. (1988) *Reproductive success studies of individual variation in contrasting*  
436 *breeding systems*. University of Chicago Press, Chicago.
- 437 Craig, J.K., Burke, B.J., Crowder, L.B. & Rice, J.A. (2006) Prey growth and size-dependent  
438 predation in juvenile estuarine fishes: experimental and model analyses. *Ecology*, **87**,  
439 2366-2377.

- 440 Donelson, J.M., Munday, P.L., McCormick, M.I. & Pitcher, C.R. (2012) Rapid transgenerational  
441 acclimation of a tropical reef fish to climate change. *Nature Climate Change*, **2**, 30-32.
- 442 Donelson, J.M., Salinas, S., Munday, P.L. & Shama, L.N.S. (2018) Transgenerational plasticity  
443 and climate change experiments: where do we go from here? *Global Change Biology*, **24**,  
444 13-34.
- 445 Easterling, D.R., Meehl, G.A., Parmesan, C., Changnon, S.A., Karl, T.R. & Mearns, L.O. (2000)  
446 Climate extremes: observations, modeling, and impacts. *Science*, **289**, 2068-2074.
- 447 Fisher, R.A. (1930) *The genetical theory of natural selection*. Clarendon Press, Oxford.
- 448 García-Guerrero, M., Villarreal, H. & Racotta, I.S. (2003) Effect of temperature on lipids,  
449 proteins, and carbohydrates levels during development from egg extrusion to juvenile  
450 stage of *Cherax quadricarinatus* (Decapoda : Parastacidae). *Comparative Biochemistry*  
451 *and Physiology a-Molecular & Integrative Physiology*, **135**, 147-154.
- 452 Gillooly, J.F., Brown, J.H., West, G.B., Savage, V.M. & Charnov, E.L. (2001) Effects of size and  
453 temperature on metabolic rate. *Science*, **293**, 2248-2251.
- 454 Groeters, F.R. & Dingle, H. (1988) Genetic and maternal influences on life-history plasticity in  
455 milkweed bugs (*Oncopeltus*): response to temperature. *Journal of Evolutionary Biology*,  
456 **1**, 317-333.
- 457 Groothuis, T.G.G. & Schwabl, H. (2008) Hormone-mediated maternal effects in birds:  
458 mechanisms matter but what do we know of them? *Philosophical Transactions of the*  
459 *Royal Society B*, **363**, 1647-1661.
- 460 Hance, T., van Baaren, J., Vernon, P. & Boivin, G. (2007) Impact of extreme temperatures on  
461 parasitoids in a climate change perspective. *Annual Review of Entomology*, **52**, 107-126.
- 462 Heath, D.D., Fox, C.W. & Heath, J.W. (1999) Maternal effects on offspring size: variation  
463 through early development of chinook salmon. *Evolution*, **53**, 1605-1611.

- 464 Huey, R.B., Wakefield, T., Crill, W.D. & Gilchrist, G.W. (1995) Within- and between-generation  
465 effects of temperature on early fecundity of *Drosophila melanogaster*. *Heredity*, **74**, 216-  
466 223.
- 467 Iguchi, N. & Ikeda, T. (2005) Effects of temperature on metabolism, growth and growth  
468 efficiency of *Thysanoessa longipes* (Crustacea : Euphausiacea) in the Japan Sea. *Journal*  
469 *of Plankton Research*, **27**, 1-10.
- 470 Jang, E.B. (1991) Thermal death kinetics and heat tolerance in early and late 3rd instars of the  
471 oriental fruit fly (Diptera, Tephritidae). *Journal of Economic Entomology*, **84**, 1298-1303.
- 472 Janhunen, M., Piironen, J. & Peuhkuri, N. (2010) Parental effects on embryonic viability and  
473 growth in Arctic charr *Salvelinus alpinus* at two incubation temperatures. *Journal of Fish*  
474 *Biology*, **76**, 2558-2570.
- 475 Jann, P. & Ward, P.I. (1999) Maternal effects and their consequences for offspring fitness in the  
476 Yellow Dung Fly. *Functional Ecology*, **13**, 51-58.
- 477 Janzen, F.J. (1993) An experimental analysis of natural selection on body size of hatchling  
478 turtles. *Ecology*, **74**, 332-341.
- 479 Karl, T.R. & Trenberth, K.E. (2003) Modern global climate change. *Science*, **302**, 1719-1723.
- 480 Kirtman, B., Power, S.B., Adedoyin, J.A., Boer, G.J., Bojariu, R., Camilloni, I., Doblaz-Reyes,  
481 F.J., Fiore, A.M., Kimoto, M., Meehl, G.A., Prather, M., Sarr, A., Schär, C., Sutton, R.,  
482 van Oldenborg, G.J., Vecchi, G. & Wang, H.J. (2013) Near-term climate change:  
483 projections and predictability. *Climate change 2013: the physical science basis.*  
484 *Contribution of working group I to the fifth assessment report of the Intergovernmental*  
485 *Panel on Climate Change. Summary for policy makers* (eds T.F. Stocker, D. Qin, G.-K.  
486 Plattner, M.M.B. Tignor, S.K. Allen, J. Boschung, A. Nauels, Y. Xia, V. Bex & P.M.  
487 Midgley), pp. 953-1028. Cambridge University Press, Cambridge and New York.

- 488 Klockmann, M., Günter, F. & Fischer, K. (2017) Heat resistance throughout ontogeny: body size  
489 constrains thermal tolerance. *Global Change Biology*, **23**, 686-696.
- 490 Leicht, K., Jokela, J. & Seppälä, O. (2013) An experimental heat wave changes immune defense  
491 and life history traits in a freshwater snail. *Ecology and Evolution*, **3**, 4861-4871.
- 492 Leicht, K., Seppälä, K. & Seppälä, O. (2017) Potential for adaptation to climate change: family-  
493 level variation in fitness-related traits and their responses to heat waves in a snail  
494 population. *Bmc Evolutionary Biology*, **17**, 140.
- 495 Levitan, D.R. (2000) Optimal egg size in marine invertebrates: theory and phylogenetic analysis  
496 of the critical relationship between egg size and development time in echinoids. *American*  
497 *Naturalist*, **156**, 175-192.
- 498 Marshall, D.J. (2008) Transgenerational plasticity in the sea: context-dependent maternal effects  
499 across the life history. *Ecology*, **89**, 418-427.
- 500 McCormick, M.I. (1999) Experimental test of the effect of maternal hormones on larval quality  
501 of a coral reef fish. *Oecologia*, **118**, 412-422.
- 502 Meehl, G.A. & Tebaldi, C. (2004) More intense, more frequent, and longer lasting heat waves in  
503 the 21st century. *Science*, **305**, 994-997.
- 504 Miller, G.M., Watson, S.-A., Donelson, J.M., McCormick, M.I. & Munday, P.L. (2012) Parental  
505 environment mediates impacts of increased carbon dioxide on a coral reef fish. *Nature*  
506 *Climate Change*, **2**, 858-861.
- 507 Mitchell, S.E. & Read, A.F. (2005) Poor maternal environment enhances offspring disease  
508 resistance in an invertebrate. *Proceedings of the Royal Society B*, **272**, 2601-2607.
- 509 Moran, A.L. & Woods, H.A. (2007) Oxygen in egg masses: interactive effects of temperature,  
510 age, and egg-mass morphology on oxygen supply to embryos. *Journal of Experimental*  
511 *Biology*, **210**, 722-731.

- 512 Moret, Y. (2006) 'Trans-generational immune priming': specific enhancement of the  
513 antimicrobial immune response in the mealworm beetle, *Tenebrio molitor*. *Proceedings of*  
514 *the Royal Society B*, **273**, 1399-1405.
- 515 Mousseau, T.A. & Dingle, H. (1991) Maternal effects in insect life histories. *Annual Review of*  
516 *Entomology*, **36**, 511-534.
- 517 Mousseau, T.A. & Fox, C.W. (1998a) *Maternal effects as adaptations*. Oxford University Press,  
518 New York.
- 519 Mousseau, T.A. & Fox, C.W. (1998b) The adaptive significance of maternal effects. *Trends in*  
520 *Ecology & Evolution*, **13**, 403-407.
- 521 Nakadera, Y., Blom, C. & Koene, J.M. (2014) Duration of sperm storage in the simultaneous  
522 hermaphrodite *Lymnaea stagnalis*. *Journal of Molluscan Studies*, **80**, 1-7.
- 523 Nakadera, Y., Mariën, J., Van Straalen, N.M. & Koene, J.M. (2017) Multiple mating in natural  
524 populations of a simultaneous hermaphrodite, *Lymnaea stagnalis*. *Journal of Molluscan*  
525 *Studies*, **83**, 56-62.
- 526 Noble, D.W.A., Stenhouse, V. & Schwanz, L.E. (2018) Developmental temperatures and  
527 phenotypic plasticity in reptiles: a systematic review and meta-analysis. *Biological*  
528 *Reviews*, **93**, 72-97.
- 529 Parker, L.M., Ross, P.M., O'Connor, W.A., Borysko, L., Raftos, D.A. & Portner, H.-O. (2012)  
530 Adult exposure influences offspring response to ocean acidification in oysters. *Global*  
531 *Change Biology*, **18**, 82-92.
- 532 Parmesan, C. & Yohe, G. (2003) A globally coherent fingerprint of climate change impacts  
533 across natural systems. *Nature*, **421**, 37-42.



- 534 Pepin, P. (1991) Effect of temperature and size on development, mortality, and survival rates of  
535 the pelagic early life history stages of marine fish. *Canadian Journal of Fisheries and*  
536 *Aquatic Sciences*, **48**, 503-518.
- 537 Person-Le Ruyet, J., Mahé, K., Le Bayon, N. & Le Delliou, H. (2004) Effects of temperature on  
538 growth and metabolism in a Mediterranean population of European sea bass,  
539 *Dicentrarchus labrax*. *Aquaculture*, **237**, 269-280.
- 540 Pettay, J.E., Charmantier, A., Wilson, A.J. & Lummaa, V. (2008) Age-specific genetic and  
541 maternal effects in fecundity of preindustrial finnish women. *Evolution*, **62**, 2297-2304.
- 542 Pörtner, H.O., Lucassen, M. & Storch, D. (2005) Metabolic biochemistry: its role in thermal  
543 tolerance and in the capacities of physiological and ecological function. *The Physiology of*  
544 *Polar Fishes (Fish Physiology 21)* (eds J.F. Steffensen, A.P. Farrell, W.S. Hoar & D.R.  
545 Randall). Elsevier Academic Press, San Diego.
- 546 Puurtinen, M., Knott, K.E., Suonpää, S., Nissinen, K. & Kaitala, V. (2007) Predominance of  
547 outcrossing in *Lymnaea stagnalis* despite low apparent fitness costs of self-fertilization.  
548 *Journal of Evolutionary Biology*, **20**, 901-912.
- 549 Saino, N., Romano, M., Ambrosini, R., Ferrari, R.P. & Møller, A.P. (2004) Timing of  
550 reproduction and egg quality covary with temperature in the insectivorous Barn Swallow,  
551 *Hirundo rustica*. *Functional Ecology*, **18**, 50-57.
- 552 Salinas, S. & Munch, S.B. (2012) Thermal legacies: transgenerational effects of temperature on  
553 growth in a vertebrate. *Ecology Letters*, **15**, 159-163.
- 554 Salo, T., Stamm, C., Burdon, F.J., Räsänen, K. & Seppälä, O. (2017) Resilience to heat waves in  
555 the aquatic snail *Lymnaea stagnalis*: additive and interactive effects with micropollutants.  
556 *Freshwater Biology*, **62**, 1831-1846.

- 557 Seppälä, O. & Jokela, J. (2011) Immune defence under extreme ambient temperature. *Biology*  
558 *Letters*, **7**, 119-122.
- 559 Shama, L.N.S., Strobel, A., Mark, F.C. & Wegner, K.M. (2014) Transgenerational plasticity in  
560 marine sticklebacks: maternal effects mediate impacts of a warming ocean. *Functional*  
561 *Ecology*, **28**, 1482-1493.
- 562 Sibert, V., Ouellet, P. & Brêthes, J.C. (2004) Changes in yolk total proteins and lipid components  
563 and embryonic growth rates during lobster (*Homarus americanus*) egg development  
564 under a simulated seasonal temperature cycle. *Marine Biology*, **144**, 1075-1086.
- 565 Silbermann, R. & Tatar, M. (2000) Reproductive costs of heat shock protein in transgenic  
566 *Drosophila melanogaster*. *Evolution*, **54**, 2038-2045.
- 567 Steer, M.A., Moltschaniwskyj, M.A., Nichols, D.S. & Miller, M. (2004) The role of temperature  
568 and maternal ration in embryo survival: using the dumpling squid *Euprymna tasmanica* as  
569 a model. *Journal of Experimental Marine Biology and Ecology*, **307**, 73-89.
- 570 Steigenga, M.J. & Fischer, K. (2007) Within- and between-generation effects of temperature on  
571 life-history traits in a butterfly. *Journal of Thermal Biology*, **32**, 396-405.
- 572 Tessier, A.J., Henry, L.L., Goulden, C.E. & Durand, M.W. (1983) Starvation in *Daphnia*: energy  
573 reserves and reproductive allocation. *Limnology and Oceanography*, **28**, 667-676.
- 574 Uller, T. & Olsson, M. (2010) Offspring size and timing of hatching determine survival and  
575 reproductive output in a lizard. *Oecologia*, **162**, 663-671.
- 576 Vaughn, C.M. (1953) Effects of temperature on hatching and growth of *Lymnaea stagnalis*  
577 *appressa* Say. *American Midland Naturalist*, **49**, 214-228.
- 578 Wadgymar, S.M., Mactavish, R.M. & Anderson, J.T. (2018) Transgenerational and within-  
579 generation plasticity in response to climate change: insights from a manipulative field  
580 experiment across an elevational gradient. *American Naturalist*, **in press**.

- 581 Walther, G.-R., Post, E., Convey, P., Menzel, A., Parmesan, C., Beebee, T.J.C., Fromentin, J.M.,  
582 Hoegh-Guldberg, O. & Bairlein, F. (2002) Ecological responses to recent climate change.  
583 *Nature*, **416**, 389-395.
- 584 Walther, G.-R. (2010) Community and ecosystem responses to recent climate change.  
585 *Philosophical Transactions of the Royal Society B*, **365**, 2019-2024.
- 586 Warkentin, K.M. (1999) Effects of hatching age on development and hatchling morphology in  
587 the red-eyed treefrog, *Agalychnis callidryas*. *Biological Journal of the Linnean Society*,  
588 **68**, 443-470.
- 589 Warner, D.A. & Shine, R. (2007) Fitness of juvenile lizards depends on seasonal timing of  
590 hatching, not offspring body size. *Oecologia*, **154**, 65-73.
- 591 Williams, G.C. (1966) Natural selection costs of reproduction and a refinement of Lack's  
592 principle. *American Naturalist*, **100**, 687-690.
- 593 Woods, H.A. (1999) Egg-mass size and cell size: effects of temperature on oxygen distribution.  
594 *American Zoologist*, **39**, 244-252.
- 595 Yampolsky, L.Y. & Scheiner, S.M. (1996) Why larger offspring at lower temperatures? A  
596 demographic approach. *American Naturalist*, **147**, 86-100.
- 597 Zhang, W., Chang, X.-Q., Hoffmann, A.A., Zhang, S. & Ma, C.-S. (2015) Impact of hot events at  
598 different developmental stages of a moth: the closer to adult stage, the less reproductive  
599 output. *Scientific Reports*, **5**, 10436.
- 600 Zuo, W.Y., Moses, M.E., West, G.B., Hou, C. & Brown, J.H. (2012) A general model for effects  
601 of temperature on ectotherm ontogenetic growth and development. *Proceedings of the*  
602 *Royal Society B*, **279**, 1840-1846.
- 603
